# Supplementary material for: Notch dimerization and gene dosage are important for normal heart development, intestinal stem cell maintenance, and splenic marginal zone B-cell homeostasis during mite infestation
Source: PLOS journal article supplement (doi:10.1371/journal.pbio.3000850), 2020-10-05
Supplement: S7 (10.1371/journal.pbio.3000850.s007) [file journal.pbio.3000850.s007]

**S1 Table. Chi-squared analysis of pups (p0 and p1) born in of  $N1^{RA/RA};N2^{RA/RA}$  x  $N1^{+/-};N2^{+/-}$  cross in mite-free housing**

|                                         |                        | <i>expected</i> |      | <i>observed</i> |        | $\frac{(O-E)^2}{O}$           |
|-----------------------------------------|------------------------|-----------------|------|-----------------|--------|-------------------------------|
| F1                                      | $N1^{RA/-}; N2^{RA/-}$ | 25%             | 47.5 | 14              | 7.37%  | 23.63                         |
|                                         | $N1^{RA/-}; N2^{+/RA}$ | 25%             | 47.5 | 47              | 24.74% | 0.01                          |
|                                         | $N1^{+/RA}; N2^{RA/-}$ | 25%             | 47.5 | 51              | 26.84% | 0.26                          |
|                                         | $N1^{+/RA}; N2^{+/RA}$ | 25%             | 47.5 | 78              | 41.05% | 19.58                         |
|                                         |                        | 100%            | 190  | 190             | 100%   | 43.47                         |
| Degree of freedom (# of genotypes -1)=3 |                        |                 |      | CHISQ.DIST      |        | <b><math>p=10^{-9}</math></b> |
